# Supplementary material
Source: PubMed Central journal article supplement (PMC3593844)
Supplement: 1213471110_pnas.201213471SI.pdf [file 1213471110_pnas.201213471SI.pdf]

# Supporting Information

Schroeder et al. 10.1073/pnas.1213471110

## SI Materials and Methods

**Wavelength Settings.** Auto-fluorescence: excitation (exc) 340 nm, emission (em) >480 nm. JC-1 (10 min loading with 5  $\mu$ M): exc 488 nm, em 580 nm/525 nm. Tetramethylrhodamine ethyl ester (TMRE; 5 min loading with 10  $\mu$ M): exc 555 nm, em >600 nm. Mag-Indo1 (10 min AM-loading with 10  $\mu$ M): exc 361 nm, em 475 nm/400 nm. cSNARF-1 (myocytes: 10–60 min AM-loading with 10  $\mu$ M; longer loading-times favored greater partitioning into mitochondria; isolated mitochondria: 30 min AM-loading with 50  $\mu$ M): exc 555 nm (confocal) or 488 nm (flow cytometer), em 580 nm/640 nm. BCECF (30 min AM-loading with 20  $\mu$ M): alternating exc 440/495 nm, em 525 nm. BCECF and cSNARF-1 ratios were calibrated by the nigericin technique (1). DHPE-fluorescein (DHPE-F; mitochondrial colocalization experiments: 90 s exposure to 1 mM; intermembrane space (IMS) measurements: 10 min loading with 10  $\mu$ M): alternating exc 405/488 nm, em >520 nm. Also see ref. 2 for details of the loading procedure with phospholipid-tagged fluorescein derivatives. Wheat germ agglutinin (WGA)-fluorescein (10 min loading with 10  $\mu$ M): alternating exc 405/488 nm, em >520 nm (correction for auto-fluorescence: determined as the *x*-axis intercept of the plot of 405 nm- vs. 488 nm-excited fluorescence under constant pH). DHPE- and WGA-fluorescein ratios were calibrated to pH by exposure to a highly buffered solution of fixed pH without respiratory substrates. Alexa Fluor 555: exc 555 nm, em >560 nm.

**Preparation of Hyperpolarized [1-<sup>13</sup>C]Pyruvate.** [1-<sup>13</sup>C]Pyruvic acid was prepared and polarized in a <sup>13</sup>C polarizer system (Oxford Instruments) (3) with 15 mM OX063 and a trace amount of the gadolinium compound 1,3,5-Tris-(*N*-(DO3A-acetamido)-*N*-methyl-4-amino-2-methylphenyl)-[1,3,5]triazinane-2,4,6-trione, referred to here as “3-Gd.” The [1-<sup>13</sup>C]pyruvic acid and trityl radical OX063 were obtained from GE Healthcare (Amersham), and 3-Gd was obtained from Imagina AB. [1-<sup>13</sup>C]Pyruvate was generated via dissolution of the [1-<sup>13</sup>C]pyruvic acid in hyperpolarized <sup>13</sup>C dissolution buffer (13CB) after >45 min to allow nuclear polarization to build up.

**In Vivo Hyperpolarized <sup>13</sup>C Magnetic Resonance Spectroscopy on Anesthetized Rats.** A home-built <sup>1</sup>H/<sup>13</sup>C butterfly coil was placed over the rat’s chest, localizing signal from the heart. Rats were anesthetized and monitored as described previously (3) and positioned in a 7-T horizontal-bore MR scanner interfaced to a Varian Inova console (Varian Medical Systems). Correct positioning was confirmed by the acquisition of an axial proton image. An ECG-gated shim was used to reduce the proton line width to ~120 Hz. Immediately before infusion, an ECG-gated <sup>13</sup>C-MR pulse-acquire spectroscopy sequence was initiated. One milliliter of hyperpolarized pyruvate was infused over 10 s into the anesthetized rat. Thirty individual cardiac spectra were acquired over 1 min following infusion (2-s temporal resolution; 7.5° excitation flip angle; 180 parts per million (ppm) sweep width; 4,096 acquired points; frequency centered at 125 ppm). Resonances corresponding with the cardiac H<sup>13</sup>CO<sub>3</sub><sup>-</sup> and <sup>13</sup>CO<sub>2</sub> resonances were located at 161 and 125 ppm, respectively.

**Ex Vivo Experiments on Perfused Hearts. Preparation for Langendorff perfusion.** Male Wistar rats (~300 g) were anesthetized using a 0.7-mL i.p. injection of pentobarbital sodium (200 mg/mL Euthatal, Merial, UK). The beating hearts were removed quickly and arrested in ice-cold Krebs–Henseleit buffer (KHB, Sigma-Aldrich, UK), and the aorta was cannulated for perfusion in

recirculating retrograde Langendorff mode (15 mL/min) at a constant 85 mmHg pressure and 37 °C. KHB solution was supplemented with 11 mM glucose and 0.6 mM Na-pyruvate.

The development of intraventricular pressure resulting from Thebesian artery drainage was minimized by the insertion of polyethylene tubing through the apex of the heart. End diastolic pressure was set to ~6 mmHg. Heart rate and left ventricular systolic and diastolic pressure were recorded continuously using a PowerLab/4SP data acquisition system (ADInstruments Ltd). The perfused heart was placed in a 20-mm NMR sample tube and positioned inside the bore of an 11.7-T Bruker spectrometer (500 MHz for <sup>1</sup>H resonances; Bruker Biospin). The function of each heart was allowed to stabilize in the bore of the magnet while the heart was imaged to localize it in the center of the rf coils, and a slice-selective shim was implemented to reduce <sup>1</sup>H line width to ~50 Hz.

**Hyperpolarized <sup>13</sup>C magnetic resonance spectroscopy in perfused hearts.** [1-<sup>13</sup>C]Pyruvate for ex vivo experiments was prepared as described above but was polarized in a HyperSense <sup>13</sup>C polarizer system (Oxford Instruments) (4). Upon dissolution, 6 mL of hyperpolarized tracer (20 mM Na-pyruvate, pH 7.4, temperature ~40 °C) was infused directly into 190 mL of oxygenated KHB + glucose (pyruvate-free), in a water-jacketed reservoir at 37 °C. Where indicated, inhibitors 4-(2,4,6-trimethylpyridinium-*N*-methylcarboxamido)-benzenesulfonamide perchlorate (C23), acetazolamide (ATZ), and 4,4'-diisothiocyanatostilbene-2,2'-disulfonic acid (DIDS) were added to this perfusate. After dissolution of hyperpolarized [1-<sup>13</sup>C]pyruvate, pyruvate in the buffer was 0.6 mM. Acquisition of <sup>13</sup>C MR spectra commenced immediately after infusion of hyperpolarized [1-<sup>13</sup>C]pyruvate, and infusion continued throughout acquisition. Spectra were acquired with 1-s temporal resolution over 2 min (30° excitation flip angle, 120 acquisitions). Spectra were centered at 125 ppm and referenced to the [1-<sup>13</sup>C]pyruvate resonance at 171 ppm, and 4,096 points were acquired over a bandwidth of 180 ppm.

**H<sup>13</sup>CO<sub>3</sub><sup>-</sup> quenching protocol in perfused hearts.** Two sequential experiments then were performed in each perfused heart:

- i) Control: Hyperpolarized [1-<sup>13</sup>C]pyruvate was diluted to 0.6 mM and perfused into the heart, and <sup>13</sup>C metabolites were detected with 1-s temporal resolution over the course of 2 min (30° excitation flip angle, 120 acquisitions, 180 ppm sweep width; 4,096 acquired points; frequency centered at 125 ppm). The precise frequency of the <sup>13</sup>C-bicarbonate resonance was noted.
- ii) HCO<sub>3</sub><sup>-</sup> saturation: After a second dose of [1-<sup>13</sup>C]pyruvate was polarized (45 min), 0.6 mM [1-<sup>13</sup>C]pyruvate again was delivered to the heart, and <sup>13</sup>C spectra were acquired as before while rf saturation was applied at 20-s intervals exactly at the H<sup>13</sup>CO<sub>3</sub><sup>-</sup> resonance. To achieve the continuous saturation at the appropriate resonance frequency, a cascade of eight repeated SNEEZE pulses (5, 6) was applied. Each SNEEZE pulse had a time-bandwidth product of 5.82 and 100-ms duration, with 100- $\mu$ s intervals between pulses. No saturation was applied during signal acquisition (180  $\mu$ s). The effective FWHM bandwidth was ~160 Hz when tested on a sample of acetone.

**<sup>31</sup>P magnetic resonance spectroscopy in perfused hearts.** Initially, an unsaturated <sup>31</sup>P MR spectrum was acquired at 202.5 MHz from the hearts using a 90° pulse with repetition time of 15 s and 40 transients. Dynamic <sup>31</sup>P MR spectra were acquired using a 30° rf pulse and a repetition delay of 0.25 s throughout the protocol. Each spectrum consisted of 120 transients, giving a total acquisition time of 30 s. The unsaturated spectra were used to correct metabolite concentrations for the effects of saturation.

**Analysis of Magnetic Resonance Spectroscopy Data.** <sup>13</sup>C. Cardiac <sup>13</sup>C MR spectra were analyzed using the AMARES algorithm, as implemented in the jMRUI software package (7). Spectra were corrected for DC offset based on the last half of acquired points, and peaks corresponding with [1-<sup>13</sup>C]pyruvate and its metabolic derivatives were fitted assuming a Lorentzian line shape and initial peak frequencies, relative phases, and line widths. For spectra acquired in vivo, the maximum peak area of each metabolite over the acquisition was determined for each series of spectra and expressed as a ratio normalized to the maximum [1-<sup>13</sup>C]pyruvate resonance (3). The rate of signal production for each metabolite, in arbitrary units (a.u.) per second, was measured as the slope of the mean metabolite increase over the first 5 s following its appearance, during which time the metabolite signal increased linearly.

<sup>31</sup>P. Cardiac <sup>31</sup>P MR spectra were analyzed using the AMARES algorithm in the jMRUI software package (7). Spectra were corrected for DC offset using the last half of acquired points. The phosphocreatine (PCr) resonance was set at 0 ppm, and the chemical shifts of all peaks were referenced to that of PCr. The PCr, P<sub>i</sub>, and γ-ATP resonances were fitted assuming a Lorentzian line shape, peak frequencies, relative phases, line widths, and J-coupling parameters.

## SI Computational Methods

**Determining Carbonic Anhydrase Activity from pH Time Courses Measured in Lysates.** Lysate carbonic anhydrase (CA) activity was determined by best-fitting the experimental time course of medium acidification upon CO<sub>2</sub> addition (at 4 °C) with a mathematical model (8) formulated below:

$$\frac{dpH}{dt} = -\frac{CA \cdot (k_h \cdot [CO_2] - k_r \cdot [HCO_3^-] \cdot 10^{-pH})}{\beta_{HepesMes}(pH)}$$

CA, the fitting variable, is the dimensionless index of CA activity.  $k_h$  and  $k_r$  are the uncatalyzed hydration and reverse (dehydration) rate constants at 4 °C, determined experimentally in 100 μM ATZ (under the constraint that ratio  $k_r/k_h$  equals the acid-dissociation constant  $K_a$  of CO<sub>2</sub>/HCO<sub>3</sub><sup>-</sup>; 10<sup>-6.38</sup> M at 4 °C) (8). After the addition of CO<sub>2</sub>-saturated water to the lysate, the diluted Hepes and MES were each 13.3 mM. The mixture's non-CO<sub>2</sub> buffering capacity ( $\beta_{HepesMes}$ ) was derived from Hepes and MES  $K_a$  at 4 °C (10<sup>-7.68</sup> M and 10<sup>-6.27</sup> M, respectively) (8). Initial [HCO<sub>3</sub><sup>-</sup>] = 0. Initial pH = 8.0. Initial [CO<sub>2</sub>] (i.e., before hydration had begun) was determined by multiplying the pH drop (at steady state) by  $\beta_{HepesMes}$ .

**Determining CA Activity from pH Time Courses Measured in Isolated Myocytes.** Intracellular CA activity in an isolated myocyte was measured experimentally from the intracellular pH (pH<sub>i</sub>) change in response to the addition and removal of superfusate CO<sub>2</sub> at 37 °C. The best-fit CA activity was obtained by fitting experimental time courses with a mathematical model (8) of three differential equations:

$$\frac{dpH_i}{dt} = -\frac{CA \cdot (k_h \cdot [CO_2]_i - k_r \cdot [HCO_3^-]_i \cdot 10^{-pH_i})}{\beta_{int}(pH_i)},$$

$$\frac{\partial[HCO_3^-]_i}{\partial t} = CA \cdot (k_h \cdot [CO_2]_i - k_r \cdot [HCO_3^-]_i \cdot 10^{-pH_i}), \text{ and}$$

$$\frac{\partial[CO_2]_i}{\partial t} = CA \cdot (k_r \cdot [HCO_3^-]_i \cdot 10^{-pH_i} - k_h \cdot [CO_2]_i) + P_{CO_2} \cdot s \cdot ([CO_2]_o(t) - [CO_2]_i)$$

CA, the fitting variable, is the dimensionless index of CA activity.  $k_h$  and  $k_r$  are the uncatalyzed hydration and reverse (dehydration) rate constants at 37 °C, determined experimentally in

100 μM ATZ ( $k_r/k_h = 10^{-6.15}$  M at 37 °C) (9). Intrinsic buffering capacity ( $\beta_{int}$ ) was determined previously (10). Membrane CO<sub>2</sub> permeability was set to 10<sup>4</sup> μm/s (11). The myocytes's surface area/volume ratio ( $s$ ) was 0.5 μm<sup>-1</sup> (12). Extracellular [CO<sub>2</sub>] ([CO<sub>2</sub>]<sub>o</sub>) was changed from 0 to 1.2 mM (and back) at an exchange time constant of 2.7 s (Fig. S3B). Starting pH<sub>i</sub> was determined from the experiment.

**Determining CA Activity from <sup>13</sup>C Signals in Intact Hearts.** A system of ordinary differential equations (published previously in ref. 13) simulated the time course of unlabeled and hyperpolarized (denoted by \*) [1-<sup>13</sup>C]pyruvate (pyr), <sup>13</sup>CO<sub>2</sub>, and H<sup>13</sup>CO<sub>3</sub><sup>-</sup>:

$$\frac{d[pyr]_i}{dt} = P_{pyr} \cdot s \cdot ([pyr]_o - [pyr]_i) - \rho \cdot [pyr]_i + \lambda_{pyr} \cdot [pyr]_i$$

$$\frac{d[pyr^*]_i}{dt} = P_{pyr} \cdot s \cdot ([pyr^*]_o - [pyr^*]_i) - \rho \cdot [pyr^*]_i - \lambda_{pyr} \cdot [pyr^*]_i$$

$$\begin{aligned} \frac{d[CO_2]_i}{dt} = & P_{CO_2} \cdot s \cdot ([CO_2]_o - [CO_2]_i) \\ & + CA \cdot (k_r \cdot [HCO_3^-]_i \cdot [H^+]_i - k_h \cdot [CO_2]_i) \dots \\ & + \rho \cdot (3 \cdot [pyr]_i + 2 \cdot [pyr^*]_i) + \lambda_{CO_2} \cdot [CO_2]_i \end{aligned}$$

$$\begin{aligned} \frac{d[CO_2^*]_i}{dt} = & P_{CO_2} \cdot s \cdot ([CO_2^*]_o - [CO_2^*]_i) \\ & + CA \cdot (k_r \cdot [HCO_3^-]_i \cdot [H^+]_i - k_h \cdot [CO_2^*]_i) \dots \\ & + \rho \cdot [pyr^*]_i - \lambda_{CO_2} \cdot [CO_2^*]_i \end{aligned}$$

$$\frac{d[HCO_3^-]_i}{dt} = CA \cdot (k_h \cdot [CO_2]_i - k_r \cdot [HCO_3^-]_i \cdot [H^+]_i) + \lambda_{HCO_3} \cdot [HCO_3^-]_i$$

$$\begin{aligned} \frac{d[HCO_3^-]_i^*}{dt} = & CA \cdot (k_h \cdot [CO_2^*]_i - k_r \cdot [HCO_3^-]_i^* \cdot [H^+]_i) \\ & - \lambda_{HCO_3} \cdot [HCO_3^-]_i^* \end{aligned}$$

The following parameters were determined by best-fitting:  $\rho$ , a rate constant that approximated the kinetics of pyruvate respiration;  $\lambda$ , the decay constant describing the lifetime of hyperpolarized <sup>13</sup>C compounds in the intracellular space;  $k_h$  and  $k_r$ , the hydration and reverse (dehydration) reaction rate constants of the CO<sub>2</sub>-HCO<sub>3</sub> equilibrium; CA, a scalar describing CA activity.

Subscripts  $i$  and  $o$  denote intra- and extracellular concentrations. Membrane permeability to pyruvate ( $P_{pyr}$ ) and CO<sub>2</sub> ( $P_{CO_2}$ ) were set to 0.4 μm/s and 10<sup>4</sup> μm/s, respectively (11). The myocytes's surface area/volume ratio ( $s$ ) was 0.5 μm<sup>-1</sup> (12). Because of the high pH buffering capacity and the activity of pH<sub>i</sub>-regulating proteins, pH<sub>i</sub> was assumed to be constant. [CO<sub>2</sub>]<sub>o</sub> and [HCO<sub>3</sub>]<sub>o</sub> were set to their equilibrium concentrations of 1.2 mM and 22 mM, respectively. Assuming adequate capillary washout, initial [CO<sub>2</sub>]<sub>o</sub> and [HCO<sub>3</sub>]<sub>o</sub> were set to zero. Total extracellular pyruvate ([pyr]<sub>o</sub> + [pyr\*]<sub>o</sub>) was fixed to 2.5 mM, but [pyr]<sub>o</sub> and [pyr\*]<sub>o</sub> varied with time, as described below assuming that 25% of pyruvate (i.e., 0.625 mM) is hyperpolarized at C<sup>1</sup>:

$$[pyr]_0 = \begin{cases} 2.5 \text{ mM} & t < 0 \\ 2.5 - (0.625 \cdot \exp(-\alpha_E \cdot t)) \text{ mM} & t > 0; \end{cases}$$

$$[pyr^*]_0 = \begin{cases} 0 \text{ mM} & t < 0 \\ 0.625 \cdot (\exp(-\alpha_E \cdot t)) \text{ mM} & t > 0. \end{cases}$$









**Fig. 56.** Effect of ATZ on mitochondrial membrane potential ( $\psi_m$ ). Permeabilized rat ventricular myocyte, loaded with the  $\psi_m$  reporter JC-1 (5  $\mu$ M). ATZ (100  $\mu$ M) did not alter  $\psi_m$ . FCCP depolarized  $\psi_m$ . Superfusion in mitochondrial respiration buffer.



**Fig. 57.** Validation of method to measure inter-membrane space (IMS) pH using DHPE-fluorescein (DHPE-F). (A) Permeabilized rat ventricular myocytes ( $n = 8$ ) were treated with DHPE-F for 10 min before superfusion with mitochondrial respiration buffer containing  $\text{CO}_2/\text{HCO}_3^-$  (pH 7.0). The switch to  $\text{CO}_2/\text{HCO}_3^-$ -free buffer evoked a transient alkaline response (indicative of a weakly buffered space in which pH is being measured). Sustained acidification upon exposure to FCCP and recovery following inhibition of complexes I and III with myxothiazol (Myx) and rotenone (Rot), respectively, are characteristic of the pH response in the IMS. Calibration with Hepes-buffered internal solution at pH = 6.6. (B) Confocal images (100 $\times$ ) of (i) a myocyte treated with DHPE-F, showing staining of the mitochondrial boundaries, and (ii) a myocyte treated with wheat germ agglutinin-conjugated fluorescein (WGA-F), showing staining the sarcolemma, T system, and nuclei.



**Fig. 58.** (A) Calibration curve for mitochondria-loaded cSNARF-1, measured by flow cytometry. Mitochondria were suspended in high  $\text{K}^+$  solutions (at pH 6.7, 7.1, 7.6, 8.1, or 8.9) containing 5  $\mu$ M nigericin and 1  $\mu$ M FCCP. (B) Conversion of CAII concentration to CA activity (from the rate of pH change upon  $\text{CO}_2$  addition, a method similar to that shown in Fig. 1A) measured at 4  $^\circ\text{C}$  and extrapolated to 25  $^\circ\text{C}$  (based on ref. 1).

1. Forster RE (1991) Methods for the measurement of carbonic anhydrase activity. *The Carbonic Anhydrases: Cellular Physiology and Molecular Genetics* ed Dodgson SJ, Plenum, New York.



**Fig. 59.** Effect of C23 on intracellular  $[\text{Mg}^{2+}]$ . Intact rat ventricular myocyte was loaded with the  $[\text{Mg}^{2+}]$  reporter dye Mag-Indo-1. Superfusion in 5%  $\text{CO}_2/\text{HCO}_3^-$ -buffered NT. Exposure to C23 (15  $\mu$ M) did not alter intracellular  $[\text{Mg}^{2+}]$ .
